# Supplementary material for: Functional overlap among distinct G1/S inhibitory pathways allows robust G1 arrest by yeast mating pheromones
Source: PubMed Central journal article supplement — Mol Biol Cell. 2013 Dec 1;24(23):3675–88. doi: 10.1091/mbc.E13-07-0373 (PMC3842994; doi:10.1091/mbc.e13-07-0373), 2013-12-01
Supplement: supp_E13-07-0373_CombinedSupMats.pdf [file supp_E13-07-0373_CombinedSupMats.pdf]

# Supplemental Materials

*Molecular Biology of the Cell*

Pope et al.

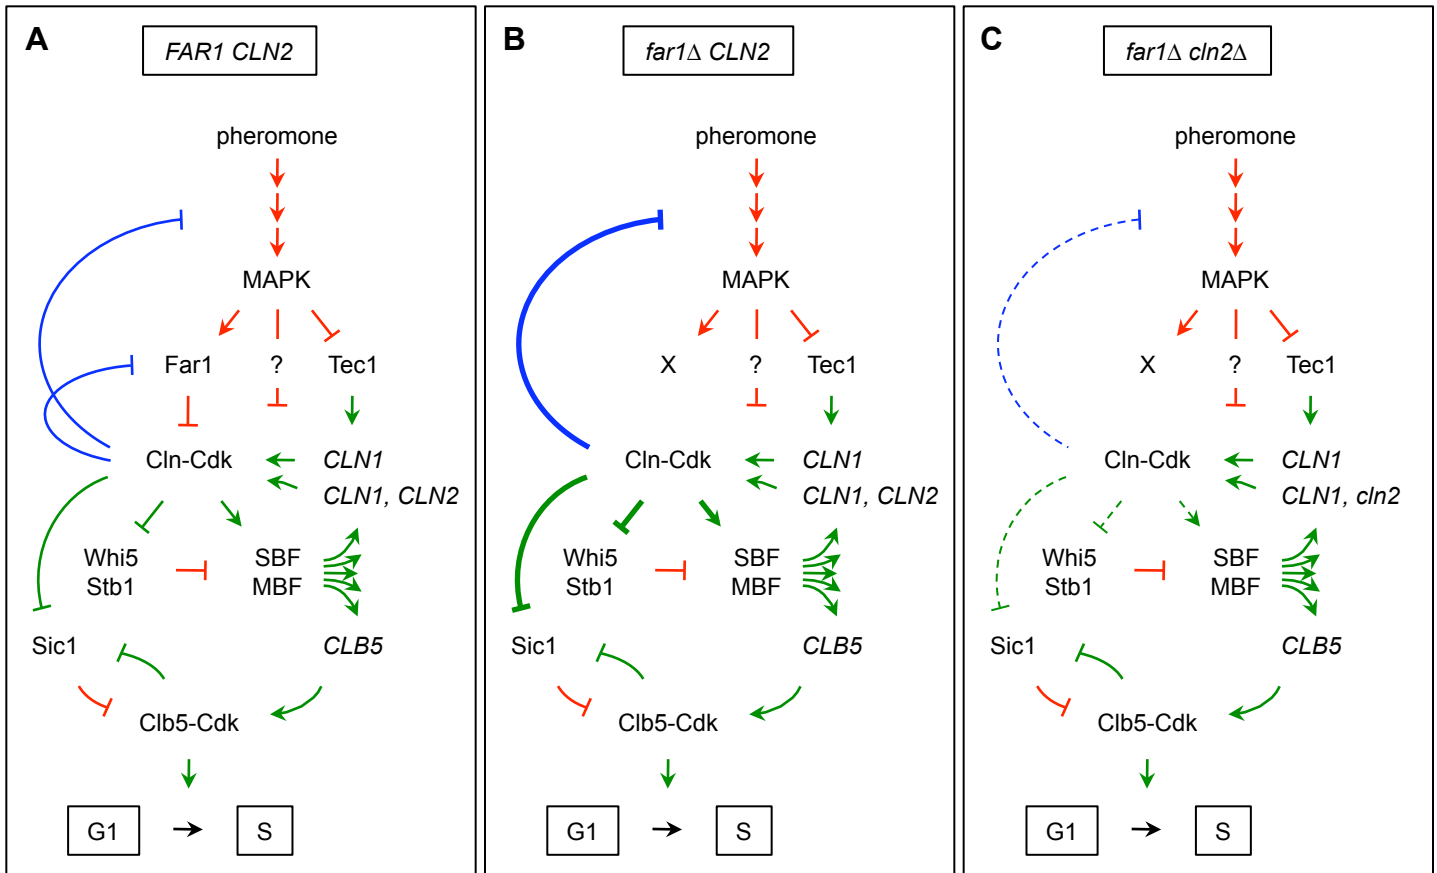

**Figure S1. Detailed illustration of regulatory pathways contributing to either pheromone arrest or cell cycle entry.**

As in Figure 8, regulatory effects that inhibit or promote the G1/S transition are indicated in red or green, respectively. In addition, inhibitory effects of Cln-Cdk activity on the pheromone pathway are indicated in blue. The question marks indicate that, in addition to regulating Far1 and Tec1, the pheromone-activated MAPK may cause post-translational effects that interfere with the synthesis and/or stability of cyclin proteins (see Discussion).

(A) The pheromone pathway and the cell cycle are mutually antagonistic. In wild-type cells, the ability of pheromone to cause G1 arrest is likely dependent on whether the pheromone signal is received prior to the accumulation of Cln-Cdk activity.

(B) In *far1Δ CLN2* cells, uninhibited Cln-Cdk can more potently drive events that promote the G1/S transition (green arrows) and that inhibit pheromone signaling (blue inhibitory arrow), resulting in resistance to pheromone arrest.

(C) In *far1Δ cln2Δ* cells, the loss of Cln2-Cdk activity can allow other pheromone-induced effects to effectively antagonize the G1/S transition, in a manner dependent on Tec1 destruction and the activities of Whi5/Stb1 and Sic1.
